# Supplementary material
Source: PubMed Central journal article supplement (PMC3172874)
Supplement: Supp_Data.pdf [file Supp_Data.pdf]

## Supplementary Data

SUPPLEMENTAL TABLE 1. PRIMERS AND PROBES FOR FLUORESCENT 5'NUCLEASE QUANTITATIVE  
TAQMAN BASED RT-PCR ASSAYS

| <i>Gene</i>  | <i>Primers</i>                                                                                           | <i>Probe</i>                               |
|--------------|----------------------------------------------------------------------------------------------------------|--------------------------------------------|
| Rat B-actin  | Primer sequences are proprietary to the Applied Biosystems TaqMan Assay-On-Demand gene expression assay. | 6FAM-5'- GCCTTCCTTCCTGGGTATGGAATCC-3'-NFQ  |
| Rat GAPDH    | Primer sequences are proprietary to the Applied Biosystems TaqMan Assay-On-Demand gene expression assay. | 6FAM-5'-GTCCCCATCCCAACTCAGCCCCCAA-3'-NFQ   |
| Rat Alox15   | Primer sequences are proprietary to the Applied Biosystems TaqMan Assay-On-Demand gene expression assay. | 6FAM-5'-CTGTCTGGGACTCGGAAGCAGAATTC-3'-NFQ  |
| Rat Casp8    | Primer sequences are proprietary to the Applied Biosystems TaqMan Assay-On-Demand gene expression assay. | 6FAM-5'-TTTCTGTTTTGGATGAGGTGACCAT-3'-NFQ   |
| Rat Il1rn    | Primer sequences are proprietary to the Applied Biosystems TaqMan Assay-On-Demand gene expression assay. | 6FAM-5'-CAAGATGCAAGCCTTCAGAATCTGG-3'-NFQ   |
| Rat F2r      | Primer sequences are proprietary to the Applied Biosystems TaqMan Assay-On-Demand gene expression assay. | 6FAM-5'- AGACAGCCAGAATCTGAGAGGATGT-3'-NFQ  |
| Rat Mmp8     | Primer sequences are proprietary to the Applied Biosystems TaqMan Assay-On-Demand gene expression assay. | 6FAM-5'-TATGAAAAGTCTGAGAATTACCTA-3'-NFQ    |
| Rat Il18     | Primer sequences are proprietary to the Applied Biosystems TaqMan Assay-On-Demand gene expression assay. | 6FAM-5'-CCTTTGAGGAAATGAATCCACCTGA-3'-NFQ   |
| Rat Mmp9     | Primer sequences are proprietary to the Applied Biosystems TaqMan Assay-On-Demand gene expression assay. | 6FAM-5'-TTCCTACTACCAAGACAAGGCCTATTT-3'-NFQ |
| Rat Tnfrsf1a | Primer sequences are proprietary to the Applied Biosystems TaqMan Assay-On-Demand gene expression assay. | 6FAM-5'-CGGCTTGACACTGCAGACCCTGCGA-3'-NFQ   |
| Rat Ptgs2    | Primer sequences are proprietary to the Applied Biosystems TaqMan Assay-On-Demand gene expression assay. | 6FAM-5'-ACGTGTTGACGTCCAGATCACATTT-3'-NFQ   |
| Rat Gfap     | Primer sequences are proprietary to the Applied Biosystems TaqMan Assay-On-Demand gene expression assay. | 6FAM-5'-CAACCTCCAGATCCGAGAAACCAGC-3'-NFQ   |
| Rat Cd38     | Primer sequences are proprietary to the Applied Biosystems TaqMan Assay-On-Demand gene expression assay. | 6FAM-5'-CCCAAAGTTTGCAGAAGATGCCTG-3'-NFQ    |
| Rat Tut1     | Primer sequences are proprietary to the Applied Biosystems TaqMan Assay-On-Demand gene expression assay. | 6FAM-5'-CTCCCTCAGTAACCGGTTGGCCTTG-3'-NFQ   |
| Rat Il33     | Primer sequences are proprietary to the Applied Biosystems TaqMan Assay-On-Demand gene expression assay. | 6FAM-5'-TTTCCTGCACAATCAGGAGACGGTG-3'-NFQ   |
| Rat Igf1     | Primer sequences are proprietary to the Applied Biosystems TaqMan Assay-On-Demand gene expression assay. | 6FAM-5'-AAGGGGCTTTTACTTCAACAAGCCC-3'-NFQ   |
| Rat Casp4    | Primer sequences are proprietary to the Applied Biosystems TaqMan Assay-On-Demand gene expression assay. | 6FAM-5'-CAACACCACACCACTTGTCTACAG-3'-NFQ    |

6FAM: 6-carboxy-fluorescein.

TAMRA: 6-carboxy-tetramethyl-rhodamine.

3BHQ\_1: Black hole quencher 1.
